# Supplementary material
Source: PubMed Central journal article supplement (PMC3105660)
Supplement: supp_96_6_e31__2.pdf [file supp_96_6_e31__2.pdf]

**Manuscript no. HAEMATOL/2011/045583 entitled “Increased incidence of central nervous system hemorrhages in patients with secondary APL after treatment of multiple sclerosis with mitoxantrone?”**

**Authors: Franziska Taube, Friedrich Stölzel, Christian Thiede, Gerhard Ehninger, Michael Laniado and Markus Schaich**

**Information about the contributions of each person named as having participated in the study**

**1) Guarantor(s)**, i.e., person(s) who is (are) responsible for the integrity of the work as a whole:  
• Franziska Taube, Medizinische Klinik und Poliklinik I, Universitätsklinikum Carl Gustav Carus Dresden, Germany, Franziska.Taube@uniklinikum-dresden.de

According to the International Committee of Medical Journal Editors (ICMJE) ([http://www.icmje.org/ethical\\_1author.html](http://www.icmje.org/ethical_1author.html)): “*Authorship credit should be based on: 1) substantial contributions to conception and design, acquisition of data, or analysis and interpretation of data; 2) drafting the article or revising it critically for important intellectual content; and 3) final approval of the version to be published. Authors should meet conditions 1, 2, and 3 ..... Acquisition of funding, collection of data, or general supervision of the research group alone does not constitute authorship*”.

The guarantors of this manuscript confirm that all persons designated as authors qualify for authorship, and that each author has participated sufficiently in the work to take public responsibility for appropriate portions of the content.

2) Authors who participated in the **conception of the study**: Franziska Taube, Friedrich Stölzel, Christian Thiede, Gerhard Ehninger, Michael Laniado and Markus Schaich

3) **Design & Methods**. The following authors were responsible for specific investigations (please detail):

- Franziska Taube was responsible for acquisition and interpretation of date and design
- Christian Thiede was responsible for molecular analysis
- Michael Laniado was responsible for procedure and interpretation of CT scan
- Friedrich Stölzel, Gerhard Ehninger and Markus Schaich were responsible for diagnosis and clinical treatment of the patient

4) **Results**. The following authors were responsible for specific portions of the results, including figures and tables (please indicate the person responsible for each figure and each table):

- Franziska Taube and Michael Laniado were responsible for the shown figure

5) **Writing the manuscript**. The following authors were responsible for writing the manuscript:

- Franziska Taube, Friedrich Stölzel, Christian Thiede, Gerhard Ehninger, Michael Laniado and Markus Schaich were responsible for writing and revising the manuscript and for final approval

6) **Contributors Listed in Acknowledgments**:
